# Supplementary material for: A Novel Extracytoplasmic Function (ECF) Sigma Factor Regulates Virulence in Pseudomonas aeruginosa
Source: PubMed Central journal article supplement (PMC2729926; doi:10.1371/journal.ppat.1000572), 2009-09-04
Supplement: ppat.1000572.s007.pdf [file ppat.1000572.s007.pdf]

**Table S2. Genes of the VreI (PA0675) regulon upregulated in wild-type PAO1 exposed to epithelial cells versus grown in TSB (adapted from reference [21])**

| Gene*                | Description*                                                               | Fold change† |
|----------------------|----------------------------------------------------------------------------|--------------|
| PA0674/ <i>pigC</i>  | hypothetical protein (PigCDE CSS receptor)                                 | 99.8         |
| PA0675/ <i>pigD</i>  | sigma-70 factor, ECF subfamily                                             | 9.0          |
| PA0676/ <i>pigE</i>  | transmembrane sensor                                                       | 9.5          |
| PA0679/ <i>hxcP</i>  | hypothetical protein                                                       | 8.3          |
| PA0680/ <i>hxcV</i>  | HxcV putative pseudopilin (Type II secretion system)                       | 24.5         |
| PA0683/ <i>hxcY</i>  | probable type II secretion system protein                                  | 3.9          |
| PA0688               | low molecular weight alkaline phosphatase                                  | 3.8          |
| PA0691               | hypothetical protein (similar to transposase)                              | 11.9         |
| PA0692               | outer membrane transporter of TPS pathway                                  | 8.9          |
| PA0693/ <i>exbB2</i> | transport protein ExbB2                                                    | 6.9          |
| PA0694/ <i>exbD2</i> | transport protein ExbD                                                     | 5.3          |
| PA0696               | hypothetical protein                                                       | 60.0         |
| PA0697               | hypothetical protein                                                       | 8.5          |
| PA0698               | hypothetical protein                                                       | 13.1         |
| PA0699               | probable peptidyl-prolyl cis-trans isomerase, PpiC-type                    | 6.3          |
| PA2384               | Probable Fur, Fe <sup>2+</sup> /Zn <sup>2+</sup> uptake regulation protein | 27.7         |

\*PA gene number, gene name and description are according to *Pseudomonas* Genome Project website (<http://www.pseudomonas.com>).

†Fold change in gene expression of wildtype PAO1 exposed to epithelial cells versus grown in TSB.
