# Supplementary material for: A Novel Extracytoplasmic Function (ECF) Sigma Factor Regulates Virulence in Pseudomonas aeruginosa
Source: PubMed Central journal article supplement (PMC2729926; doi:10.1371/journal.ppat.1000572), 2009-09-04
Supplement: ppat.1000572.s008.pdf [file ppat.1000572.s008.pdf]

**TABLE S3. Oligonucleotide primers used in this work**

| Amplified gene(s)                 | Plasmid <sup>a</sup>    | Name        | Sequence (5'→3') <sup>b</sup>                                   |
|-----------------------------------|-------------------------|-------------|-----------------------------------------------------------------|
| PA0675-PA0676                     | pUCMA3                  | Puma3F      | CACTCGTCCGGGTACCTAT                                             |
|                                   |                         | Puma3R      | CTGAGCGAGATCCCATTGC                                             |
| PA0674-PA0675                     | pMUM3R $\sigma$         | PA0674F-E   | AATGAATTCGGGTGCATGGCGATTCTCCC                                   |
|                                   |                         | PA0675R-B   | TATGGATCCCCTGCTTATGCTTATGACGG                                   |
| PA0674-PA0675(without stop codon) | pMUM3R $\sigma$ no-stop | PA0674F-E   | AATGAATTCGGGTGCATGGCGATTCTCCC                                   |
|                                   |                         | PA0675R-X   | AAATCTAGAGACGGTTTTCCGGCCCC                                      |
| PA0674-PA0675-PA0676              | pMMB-PUMA3              | PA0674F-E   | AATGAATTCGGGTGCATGGCGATTCTCCC                                   |
|                                   |                         | PA0676R-B   | AAAGGATCCGCACGCAGCAAAGTCCGC                                     |
| PA0692                            | pUCPA0692               | PA0692F-E   | AAAGAATTCGGGGATCTCATGCAGATGCC                                   |
|                                   |                         | PA0692R-H   | AAAAAGCTTCAGGCCACGCAGATCAGCG                                    |
| PA0697                            | pUCPA0697               | PA0697F-E   | AAAGAATTCAGCTCCGACGAGGTCTACG                                    |
|                                   |                         | PA0697R-H   | AAAAAGCTTAAAGGTGTTTCGATCAGGGTG                                  |
| PA0690 (C-terminal)               | pGST-0690               | PA0690F-B   | TTTGATCCCCTTCGGCGCAGTATATTGG                                    |
|                                   |                         | PA0690R-E   | AAAGAATTCAGGATCAGGTTGCCGC                                       |
| PA0674 promoter                   | pMP0674                 | PR35E       | AAAGAATTCATTCATAGGACAAAGCC                                      |
|                                   |                         | PR33X       | AAATCTAGAACCGAGCAACGACACTG                                      |
| PA0691 promoter                   | pMP0691b                | PR0691F2Bq  | TAAAGATCTGATCGCCGCGCTGTTCCCCG                                   |
|                                   |                         | PR0691RKp   | TATGGTACCGATCAAGTTCTGCATACCG                                    |
| HA-tag epitope                    | pMUM3R $\sigma$ -HAtag  | HAtagF-X    | CTAGCCTACCCGTACGACGTGCCGGACTACGCGTGCTAA                         |
|                                   |                         | HAtagR-H    | AGCTTTAGCACGCGTAGTCCGGCACGTCGTACGGGTAGG                         |
| HA-tag epitope                    | pMMB674HA               | PA0674F-E   | AATGAATTCGGGTGCATGGCGATTCTCCC                                   |
|                                   |                         | EndPA0674.2 | CTAAGCTTTAGCACGCGTAGTCCGGCACGTCGTACGGGTACCC<br>TCCAACCTCCCTCCGT |

<sup>a</sup> The name of the plasmid containing the corresponding PCR product is indicated (see Table 2 for details)

<sup>b</sup> Restriction sites within the primers are underlined
