# Supplementary material for: A Novel Extracytoplasmic Function (ECF) Sigma Factor Regulates Virulence in Pseudomonas aeruginosa
Source: PubMed Central journal article supplement (PMC2729926; doi:10.1371/journal.ppat.1000572), 2009-09-04
Supplement: ppat.1000572.s009.pdf [file ppat.1000572.s009.pdf]

**TABLE S4. Oligonucleotide primers used in the RT-PCR assays**

| <b>Gene</b> | <b>Size</b> | <b>Name</b> | <b>Sequence (5'→3')</b> |
|-------------|-------------|-------------|-------------------------|
| PA0691      | 198 bp      | PA0691F1    | TTGGCAGGGGGCGCTCAAGG    |
|             |             | PA0691R1    | GGGAATCGCGTACAGCAGTTGC  |
| PA0692      | 111 bp      | RT-PA0692F  | CCTGAACAACGACTACAGCG    |
|             |             | RT-PA0692R  | GCGGTGAAATAGGTCAGCGA    |
| PA0636      | 210 bp      | PA0636F     | CTGTCGCTTGCCAACGTGGG    |
|             |             | PA0636R     | GAAGACCTGCGACTGGAGCG    |
