# Supplementary material for: A Novel Extracytoplasmic Function (ECF) Sigma Factor Regulates Virulence in Pseudomonas aeruginosa
Source: PLoS Pathog. 2009 Sep 4;5(9):e1000572. doi: 10.1371/journal.ppat.1000572 (PMC2729926; doi:10.1371/journal.ppat.1000572)
Supplement: Table S1 — Genes of the VreI (PA0675) regulon activated in P. aeruginosa following 12 h of interaction with PNHAE epithelial cells (adapted from reference [20]). (0.01 MB PDF) [file ppat.1000572.s006.pdf]

**TABLE S1. Genes of the VreI (PA0675) regulon activated in *P. aeruginosa* following 12 h of interaction with PNHAE epithelial cells (adapted from reference [20])**

| PA no.               | Fold change <sup>a</sup> | Protein description and/or interspecies homology |
|----------------------|--------------------------|--------------------------------------------------|
| PA0674/ <i>pigC</i>  | 8.2                      | 53% similar to ferripyoverdine receptor, PigC    |
| PA0688               | 21.4                     | Hypothetical, 100% identical to PhoA             |
| PA0691               | 19.0                     | Hypothetical, transposase                        |
| PA0693/ <i>exbB2</i> | 18.4                     | ExbB2, transport protein                         |
| PA0696               | 9.0                      | Hypothetical                                     |
| PA0697               | 11.8                     | Hypothetical                                     |

<sup>a</sup>The magnitude of gene expression (fold change) was determined by comparing transcription in three replicates of PAO1 (control) with that in three replicates of PAO1 interacting with PNHAE cells after 12 h. Total RNA from the PNHAE cells alone (three replicates) was isolated, reverse transcribed into cDNA, and hybridized to the *Pseudomonas* GeneChip. The genes present from this experiment were subtracted from the analysis.
